# Supplementary material for: Shunt occlusion for portosystemic shunt syndrome related refractory hepatic encephalopathy—A single-center experience in 21 patients from Kerala
Source: Springer Nature journal article supplement (doi:10.1007/s12664-017-0787-8), 2017-09-01
Supplement: MOESM1 [file 15213536]

Shunt Occlusion for Portosystemic Shunt Syndrome Related Refractory Hepatic Encephalopathy – A Single Centre Experience in 21 Patients from Kerala

Supplementary Section:

Definitions

1. Hepatic encephalopathy: Based on time course, HE was defined as episodic, when attacks of grade ≥ 2, occurred more than six months apart, recurrent, when they recurred within a time frame of 6 months or earlier and persistent, when behavioural alterations were always present interspersed with relapses of overt HE. Medical refractoriness was defined when standard medical therapy with maximally tolerated daily lactulose/lactitol with add on non-absorbable antibiotic (rifaximin) and zinc supplementation failed to prevent HE. Hepatic encephalopathy was considered spontaneous when no precipitants were identified.**1**
2. Hepatic Parkinsonism: Patients were considered to have hepatic (cirrhotic) Parkinsonism when they had features of symmetrical peripheral tremors, bradykinesia, dysarthria, rigidity and/or associated difficulty in walking along with recurrent or persistent HE.**2**
3. Grading of hepatic encephalopathy: was done using West Haven Criteria (WHC) [https://www.mdcalc.com/hepatic-encephalopathy-grades-stages]
4. Sleep disturbances and improvement of, post procedure was assessed using Epworth Sleepiness Scale [https://www.qxmd.com/calculate/calculator_85/epworth-sleepiness-scale].
5. Neurological severity scoring:
6. Speech – as per Unified Parkinson’s Disease Rating Scale (UPDRS) - 0 = normal, 1 = mildly affected. No difficulty being understood, 2 = moderately affected. Sometimes asked to repeat statements. 3 = severely affected. Frequently asked to repeat statements. 4 = Unintelligible most of the time.**3**
7. Walking – as per UPDRS, 0 = normal, 1 = mild difficulty. May not swing arms or may tend to drag leg, 2 = moderate difficulty, but requires little or no assistance, 3 = severe disturbance of walking, requiring assistance. 4 = cannot walk at all, even with assistance.**3**
8. Falling (in the absence of freezing) – as per UPDRS, 0 = none, 1 = rare falling, 2 = occasionally falls, less than once per day, 3 = falls an average of once daily, 4 = falls more than once daily.**3**
9. Overall Hepatic Parkinsonism Severity Score - as per Modified Hoehn and Yahr Staging - Stage 0 = no signs of disease, Stage 1 = unilateral disease, Stage 1.5 = unilateral plus axial involvement, Stage 2 = bilateral disease, without impairment of balance, Stage 2.5 = mild bilateral disease, with recovery on pull test, Stage 3 = mild to moderate bilateral disease; some postural instability; physically independent, Stage 4 = severe disability; still able to walk or stand unassisted, Stage 5 = wheelchair bound or bedridden unless aided.**4**
10. Quality of Life: was measured using the Schwab and England Activities of Daily Living Scale - 100% = completely independent. Able to do all chores without slowness, difficulty or impairment. Essentially normal. Unaware of any difficulty; 90% = completely independent. Able to do all chores with some degree of slowness, difficulty and impairment. Might take twice as long. Beginning to be aware of difficulty; 80% = completely independent in most chores. Takes twice as long. Conscious of difficulty and slowness; 70% = not completely independent. More difficulty with some chores. Three to four times as long in some. Must spend a large part of the day with chores; 60% = some dependency. Can do most chores, but exceedingly slowly and with much effort. Errors; some impossible; 50% = more dependent. Help with half, slower, etc. Difficulty with everything; 40% = very dependent. Can assist with all chores, but few alone; 30% = with effort, now and then does a few chores alone or begins alone. Much help needed; 20% = nothing alone. Can be a slight help with some chores. Severe invalid; 10% = totally dependent, helpless, complete invalid; 0% = vegetative functions such as swallowing, bladder and bowel functions are not functioning, bedridden.**5**
11. Duration – short term – one to three months after PSS occlusion, intermediate – three to six months post procedure and long term, six to nine months after shunt occlusion.
12. Adverse effects were defined as per Common Terminology Criteria for Adverse Events (CTCAE); available from <https://evs.nci.nih.gov/ftp1/CTCAE/CTCAE_4.03_2010-06-14_QuickReference_5x7.pdf>

References

1. Ferenci P. Hepatic encephalopathy. Gastroenterol Rep (Oxf). 2017; 5: 138–147.
2. Burkhard PR, Delavelle J, Du Pasquier R, Spahr L. Chronic parkinsonism associated with cirrhosis: a distinct subset of acquired hepatocerebral degeneration. Arch Neurol. 2003; 60:521-8.
3. Movement Disorder Society Task Force on Rating Scales for Parkinson's Disease. The Unified Parkinson's Disease Rating Scale (UPDRS): status and recommendations. Mov Disord. 2003; 18:738-50.
4. Perlmutter JS. Assessment of Parkinson Disease Manifestations. Current protocols in neuroscience / editorial board, Jacqueline N Crawley [et al]. 2009; CHAPTER: Unit 10.1.
5. Choi YI, Song CS, Chun BY. Activities of daily living and manual hand dexterity in persons with idiopathic parkinson disease. J Phys Ther Sci. 2017; 29:457-460.
